# Supplementary material
Source: PubMed Central journal article supplement (PMC3121482)

## SUPPLEMENTAL INFORMATION

**Fig. S1** Sequence alignment of selected IclR proteins using CLUSTALW (1). Also shown are the secondary structures of BlcR determined in this study. Amino acid sequences are from the following bacteria: BlcR of this study, *Agrobacteria tumefaciens*; TM-IclR, *Thermotoga maritime*; IclR\_E, YaiJ, GclR, and AllR, *E. coli*; IclR\_Y, *Yersinia pestis*; KdgR, *Erwinia*; RexZ, *Erwinia sp*; TtgT, TtgV and PcaR, *Pseudomonas putida*; PcaU, *Acinetobacter*; TsaQ, *Comamonas testosteroni*.

**Fig. S2** ITC studies of SSA binding to **A)** wild type BlcR, and **B)** BlcR<sup>C220A</sup>. Panel descriptions are the same as Figure 3 C&D.

## REFERENCES:

1. Chenna, R., Sugawara, H., Koike, T., Lopez, R., Gibson, T. J., Higgins, D. G., and Thompson, J. D. (2003) *Nucleic Acids Res* **31**, 3497-3500

Fig. S1

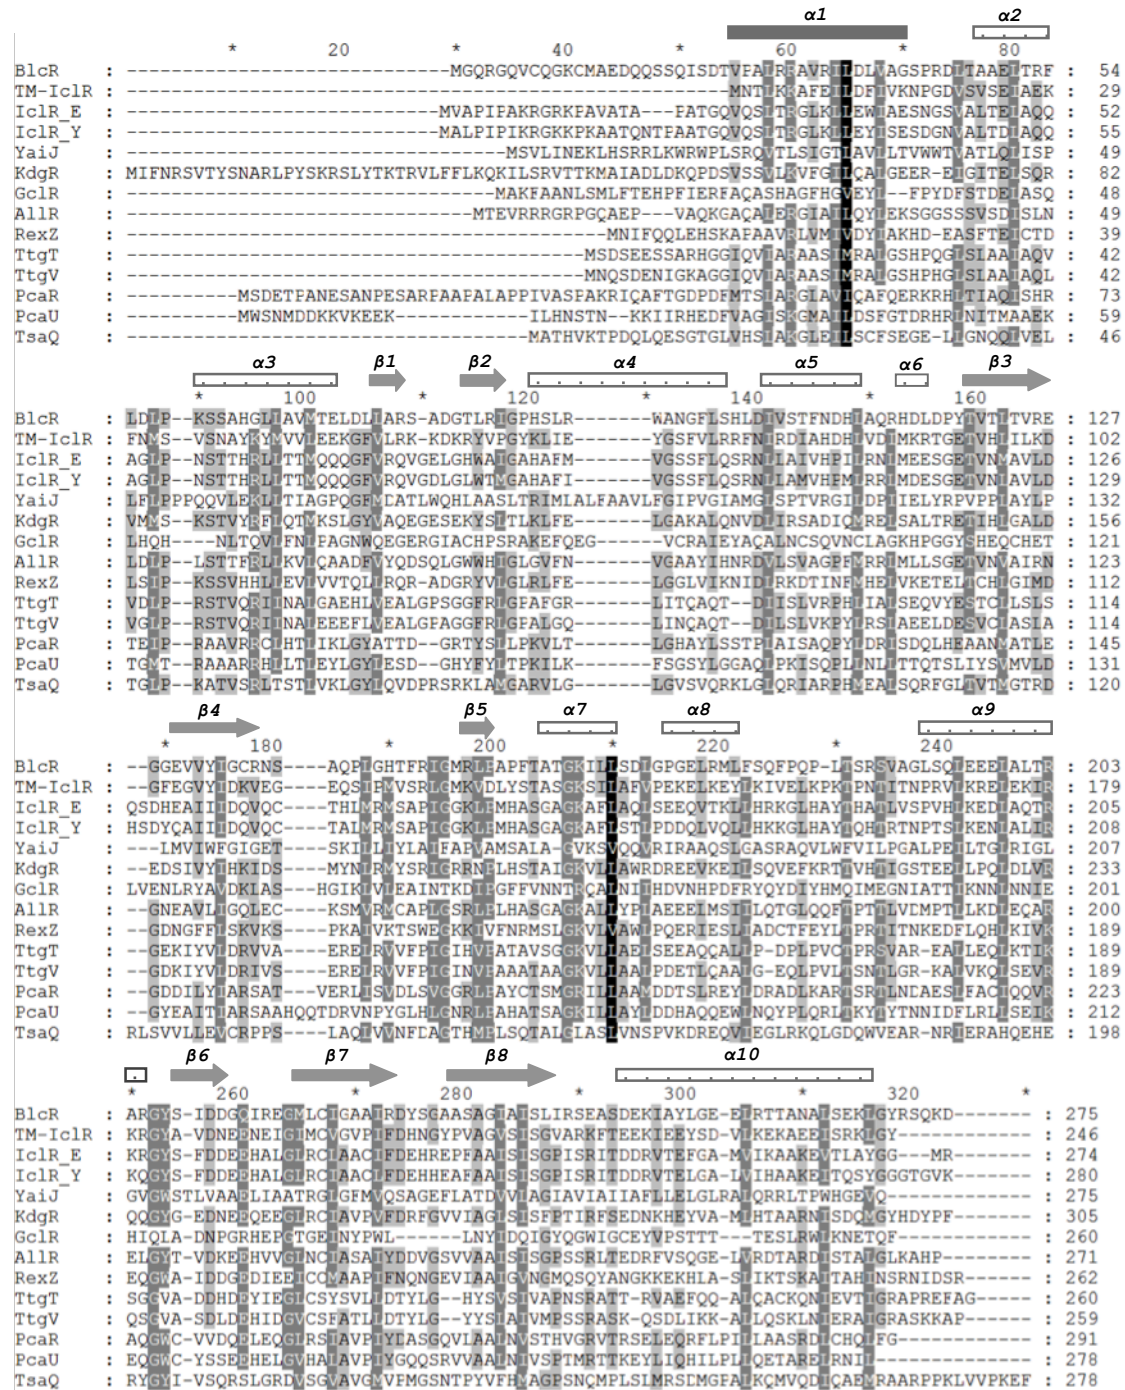

Fig. S2

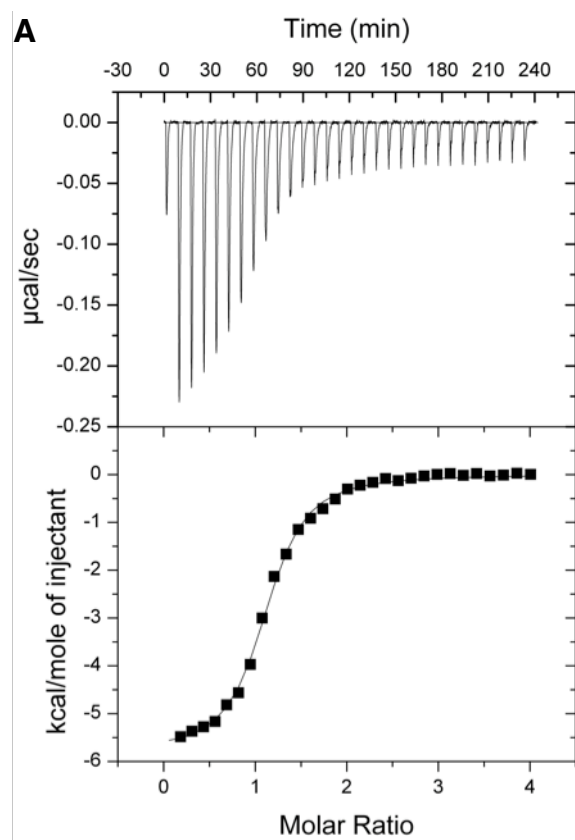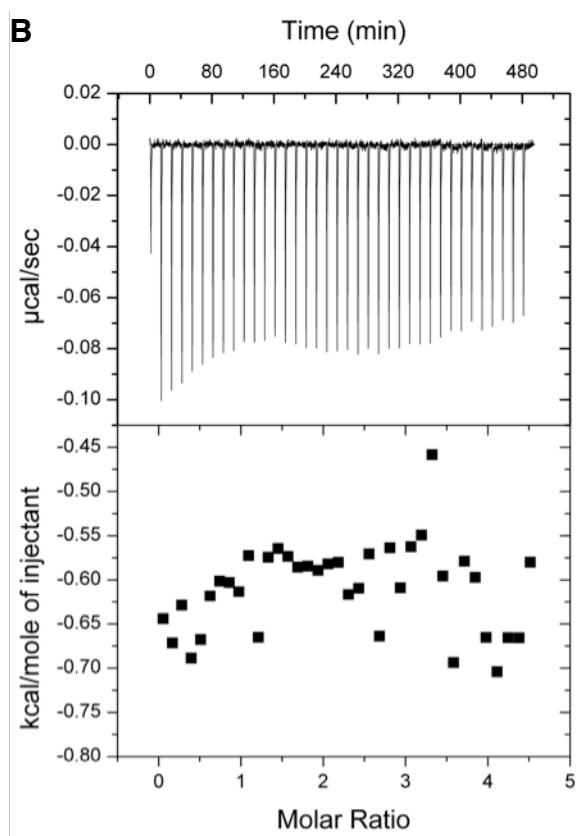

Supplement: supp_M110.196154_jbc.M110.196154-1.pdf [file supp_M110.196154_jbc.M110.196154-1.pdf]
